# Supplementary material for: Comparative Analysis of Super-enhancers Across Mammals Reveals Their High Function Conservation
Source: Research Square preprint supplement (doi:10.21203/rs.3.rs-121951/v1), 2020-12-08
Supplement: Supplementary file 1 [file bd306054c26cd89c448aa21e.csv]

accession	source	tissue	individual	species	sample	Antibody	replicate	reads_length	trim_length	sequencing	align_rates	uniq_reads_num
ENCFF355XNV	ENCODE	transverse colon	female 51 years old	Human	ENCBS555CAN	H3K27ac	rep1	76	20	SE	97.86%	8115758
ENCFF377RRF	ENCODE	transverse colon	female 51 years old	Human	ENCBS555CAN	H3K27ac	rep1	76	20	SE	98.01%	8476016
ENCFF767RRK	ENCODE	transverse colon	female 51 years old	Human	ENCBS555CAN	H3K27ac	rep1	76	20	SE	97.96%	7992320
ENCFF792AEJ	ENCODE	transverse colon	female 51 years old	Human	ENCBS555CAN	H3K27ac	rep1	76	20	SE	98.11%	8338046
ENCFF150WJQ	ENCODE	transverse colon	male 37 years old	Human	ENCBS990XOM	H3K27ac	rep2	76	20	SE	98.68%	611464
ENCFF297OWJ	ENCODE	transverse colon	male 37 years old	Human	ENCBS990XOM	H3K27ac	rep2	76	20	SE	98.44%	3652889
ENCFF368BYS	ENCODE	transverse colon	male 37 years old	Human	ENCBS990XOM	H3K27ac	rep2	76	20	SE	98.70%	271141
ENCFF369HGQ	ENCODE	transverse colon	male 37 years old	Human	ENCBS990XOM	H3K27ac	rep2	76	20	SE	96.75%	7457143
ENCFF371YTC	ENCODE	transverse colon	male 37 years old	Human	ENCBS990XOM	H3K27ac	rep2	76	20	SE	98.63%	47397
ENCFF391LOH	ENCODE	transverse colon	male 37 years old	Human	ENCBS990XOM	H3K27ac	rep2	76	20	SE	98.36%	3629267
ENCFF478NRM	ENCODE	transverse colon	male 37 years old	Human	ENCBS990XOM	H3K27ac	rep2	76	20	SE	98.41%	3702688
ENCFF615BYM	ENCODE	transverse colon	male 37 years old	Human	ENCBS990XOM	H3K27ac	rep2	76	20	SE	98.40%	3638194
ENCFF924TJF	ENCODE	transverse colon	male 37 years old	Human	ENCBS990XOM	H3K27ac	rep2	76	20	SE	96.82%	7356452
ENCFF009LTY	ENCODE	transverse colon	male 37 years old	Human	ENCBS990XOM	input	rep2	76	20	SE	97.43%	44065457
ENCFF129QRN	ENCODE	transverse colon	male 37 years old	Human	ENCBS990XOM	input	rep2	76	20	SE	97.43%	44065457
ENCFF183QCN	ENCODE	transverse colon	male 37 years old	Human	ENCBS990XOM	input	rep2	76	20	SE	97.43%	44065457
ENCFF275SJH	ENCODE	transverse colon	male 37 years old	Human	ENCBS990XOM	input	rep2	76	20	SE	97.43%	44065457
ENCFF511GZH	ENCODE	transverse colon	male 37 years old	Human	ENCBS990XOM	input	rep2	76	20	SE	97.43%	44065457
ENCFF522KUQ	ENCODE	transverse colon	male 37 years old	Human	ENCBS990XOM	input	rep2	76	20	SE	97.43%	44065457
ENCFF856BVX	ENCODE	transverse colon	male 37 years old	Human	ENCBS990XOM	input	rep2	76	20	SE	97.43%	44065457
ENCFF937MNM	ENCODE	transverse colon	male 37 years old	Human	ENCBS990XOM	input	rep2	76	20	SE	97.43%	44065457
ENCFF003LQT	ENCODE	transverse colon	female 53 years old	Human	ENCBS280DYM	H3K27ac	rep2	76	20	SE	98.32%	2527444
ENCFF113KFQ	ENCODE	transverse colon	female 53 years old	Human	ENCBS280DYM	H3K27ac	rep2	76	20	SE	98.36%	3297123
ENCFF219DYV	ENCODE	transverse colon	female 53 years old	Human	ENCBS280DYM	H3K27ac	rep2	76	20	SE	98.32%	5369507
ENCFF264CZV	ENCODE	transverse colon	female 53 years old	Human	ENCBS280DYM	H3K27ac	rep2	76	20	SE	98.33%	3314837
ENCFF270YMP	ENCODE	transverse colon	female 53 years old	Human	ENCBS280DYM	H3K27ac	rep2	76	20	SE	98.34%	4775897
ENCFF384MQH	ENCODE	transverse colon	female 53 years old	Human	ENCBS280DYM	H3K27ac	rep2	76	20	SE	98.39%	3309840
ENCFF605JUU	ENCODE	transverse colon	female 53 years old	Human	ENCBS280DYM	H3K27ac	rep2	76	20	SE	98.37%	3371186
ENCFF867PQG	ENCODE	transverse colon	female 53 years old	Human	ENCBS280DYM	H3K27ac	rep2	76	20	SE	98.42%	1838541
ENCFF024ABR	ENCODE	transverse colon	female 53 years old	Human	ENCBS280DYM	input	rep2	76	20	SE	98.10%	8725824
ENCFF155AZY	ENCODE	transverse colon	female 53 years old	Human	ENCBS280DYM	input	rep2	76	20	SE	98.16%	5867613
ENCFF250PSZ	ENCODE	transverse colon	female 53 years old	Human	ENCBS280DYM	input	rep2	76	20	SE	98.11%	9472351
ENCFF268VFB	ENCODE	transverse colon	female 53 years old	Human	ENCBS280DYM	input	rep2	76	20	SE	98.12%	2832161
ENCFF429TLP	ENCODE	transverse colon	female 53 years old	Human	ENCBS280DYM	input	rep2	76	20	SE	98.15%	5839594
ENCFF555ELI	ENCODE	transverse colon	female 53 years old	Human	ENCBS280DYM	input	rep2	76	20	SE	98.20%	5870419
ENCFF871OKS	ENCODE	transverse colon	female 53 years old	Human	ENCBS280DYM	input	rep2	76	20	SE	98.02%	3898411
ENCFF909SES	ENCODE	transverse colon	female 53 years old	Human	ENCBS280DYM	input	rep2	76	20	SE	98.19%	6006436
ENCFF349JBL	ENCODE	transverse colon	male 54 years old	Human	ENCBS633KVX	H3K27ac	rep1	76	20	SE	97.78%	8151781
ENCFF382QHO	ENCODE	transverse colon	male 54 years old	Human	ENCBS633KVX	H3K27ac	rep1	76	20	SE	98.26%	17362
ENCFF706KXN	ENCODE	transverse colon	male 54 years old	Human	ENCBS633KVX	H3K27ac	rep1	76	20	SE	98.35%	1659
ENCFF945XBP	ENCODE	transverse colon	male 54 years old	Human	ENCBS633KVX	H3K27ac	rep1	76	20	SE	97.76%	5539973
ENCFF049MGK	ENCODE	transverse colon	male 54 years old	Human	ENCBS633KVX	input	rep1	76	20	SE	97.23%	87293985
ENCFF116APJ	ENCODE	transverse colon	male 54 years old	Human	ENCBS633KVX	input	rep1	76	20	SE	97.23%	87293985
ENCFF355WSL	ENCODE	transverse colon	male 54 years old	Human	ENCBS633KVX	input	rep1	76	20	SE	97.23%	87293985
ENCFF688CVD	ENCODE	transverse colon	male 54 years old	Human	ENCBS633KVX	input	rep1	76	20	SE	97.23%	87293985
ENCFF539VAQ	ENCODE	stomach	female 51 years old	Human	ENCBS633XWN	H3K27ac	rep1	101	20	SE	98.13%	48558956
ENCFF608CMJ	ENCODE	stomach	female 51 years old	Human	ENCBS633XWN	H3K27ac	rep1	101	20	SE	98.13%	48558956
ENCFF746EJK	ENCODE	stomach	female 51 years old	Human	ENCBS633XWN	H3K27ac	rep1	101	20	SE	98.13%	48558956
ENCFF862SNF	ENCODE	stomach	female 51 years old	Human	ENCBS633XWN	H3K27ac	rep1	101	20	SE	98.13%	48558956
ENCFF048IPJ	ENCODE	stomach	female 51 years old	Human	ENCBS314VNR	input	rep1	101	20	SE	96.14%	47979468
ENCFF702VBZ	ENCODE	stomach	female 51 years old	Human	ENCBS314VNR	input	rep1	101	20	SE	96.14%	47979468
ENCFF628GCG	ENCODE	stomach	female 53 years old	Human	ENCBS642ZQR	H3K27ac	rep1	101	20	SE	98.28%	27757293
ENCFF964NOS	ENCODE	stomach	female 53 years old	Human	ENCBS642ZQR	H3K27ac	rep1	101	20	SE	98.28%	27757293
ENCFF453CTT	ENCODE	stomach	female 53 years old	Human	ENCBS296KUN	input	rep1	101	20	SE	97.35%	40426042
ENCFF857OPQ	ENCODE	stomach	female 53 years old	Human	ENCBS296KUN	input	rep1	101	20	SE	97.35%	40426042
ENCFF003HGP	ENCODE	stomach	male 37 years old	Human	ENCBS940XKF	H3K27ac	rep1	101	20	SE	97.00%	48880169
ENCFF260PYL	ENCODE	stomach	male 37 years old	Human	ENCBS940XKF	H3K27ac	rep1	101	20	SE	97.00%	48880169
ENCFF718MGE	ENCODE	stomach	male 37 years old	Human	ENCBS940XKF	H3K27ac	rep1	101	20	SE	97.00%	48880169
ENCFF753SNQ	ENCODE	stomach	male 37 years old	Human	ENCBS940XKF	H3K27ac	rep1	101	20	SE	97.00%	48880169
ENCFF871RZY	ENCODE	stomach	male 37 years old	Human	ENCBS962HLD	input	rep1	101	20	SE	96.32%	51481822
ENCFF892NGP	ENCODE	stomach	male 37 years old	Human	ENCBS962HLD	input	rep1	101	20	SE	96.32%	51481822
ENCFF002BWG	ENCODE	intestine	16.5 days old	mouse	ENCBS856EWN	H3K27ac	rep1	36	10	SE	98.88%	25513055
ENCFF002BXR	ENCODE	intestine	16.5 days old	mouse	ENCBS856EWN	input	rep1	36	10	SE	98.77%	8739054
ENCFF002BUU	ENCODE	intestine	0 day	mouse	ENCBS560AAA	H3K27ac	rep1	36	10	SE	91.87%	11321999
ENCFF002BUZ	ENCODE	intestine	0 day	mouse	ENCBS560AAA	H3K27ac	rep1	36	10	SE	91.52%	10336448
ENCFF002AQV	ENCODE	intestine	0 day	mouse	ENCBS560AAA	input	rep1	36	10	SE	95.89%	24811400
ENCFF001KTR	ENCODE	intestine	8 weeks old	mouse	ENCBS157ENC	H3K27ac	rep1	36	10	SE	95.95%	7685831
ENCFF001KUJ	ENCODE	intestine	8 weeks old	mouse	ENCBS157ENC	input	rep1	36	10	SE	87.49%	4581329
ENCFF001KTS	ENCODE	intestine	8 weeks old	mouse	ENCBS959PBQ	H3K27ac	rep2	36	10	SE	96.34%	10986664
ENCFF001KUK	ENCODE	intestine	8 weeks old	mouse	ENCBS959PBQ	input	rep2	36	10	SE	94.26%	28090185
ENCFF002AFC	ENCODE	stomach	14.5 days old	mouse	ENCBS568AAA	H3K27ac	rep1	50	10	SE	99.00%	25968497
ENCFF002AQN	ENCODE	stomach	14.5 days old	mouse	ENCBS568AAA	input	rep1	50	10	SE	98.82%	19097920
ENCFF002AFG	ENCODE	stomach	14.5 days old	mouse	ENCBS564AAA	H3K27ac	rep2	50	10	SE	97.12%	21968992
ENCFF002AQP	ENCODE	stomach	14.5 days old	mouse	ENCBS564AAA	input	rep2	50	10	SE	96.96%	22249490
ENCFF992ZDK	ENCODE	stomach	15.5 days old	mouse	ENCBS915SZN	H3K27ac	rep1	50	10	SE	98.69%	19460517
ENCFF222ZUV	ENCODE	stomach	15.5 days old	mouse	ENCBS915SZN	input	rep1	50	10	SE	98.37%	5425386
ENCFF764CBH	ENCODE	stomach	15.5 days old	mouse	ENCBS915SZN	input	rep1	50	10	SE	98.24%	37951789
ENCFF766DAD	ENCODE	stomach	15.5 days old	mouse	ENCBS915SZN	input	rep1	50	10	SE	98.41%	20579823
ENCFF377FPI	ENCODE	stomach	15.5 days old	mouse	ENCBS355TAQ	H3K27ac	rep2	50	10	SE	98.55%	31794773
ENCFF272FYH	ENCODE	stomach	15.5 days old	mouse	ENCBS355TAQ	input	rep2	50	10	SE	98.17%	4801568
ENCFF410JAO	ENCODE	stomach	15.5 days old	mouse	ENCBS355TAQ	input	rep2	50	10	SE	98.38%	10169651
ENCFF880ZJK	ENCODE	stomach	15.5 days old	mouse	ENCBS355TAQ	input	rep2	50	10	SE	98.46%	31240239
ENCFF002BWO	ENCODE	stomach	16.5 days old	mouse	ENCBS243DCE	H3K27ac	rep1	36	10	SE	98.98%	23553128
ENCFF002BYB	ENCODE	stomach	16.5 days old	mouse	ENCBS243DCE	input	rep1	36	10	SE	98.79%	21349099
ENCFF002BWV	ENCODE	stomach	16.5 days old	mouse	ENCBS793TEW	H3K27ac	rep2	36	10	SE	99.10%	27160416
ENCFF002BYC	ENCODE	stomach	16.5 days old	mouse	ENCBS793TEW	input	rep2	36	10	SE	98.78%	23304731
ERR572214	EMBL-EBI	liver	-	pig	SAMEA2677887	H3K27ac	rep1	50	20	SE	96.97%	18860977
ERR572261	EMBL-EBI	liver	-	pig	SAMEA2677843	H3K27ac	rep2	50	20	SE	96.28%	18307789
ERR572204	EMBL-EBI	liver	-	pig	SAMEA2677898	H3K27ac	rep3	50	20	SE	93.62%	18277486
ERR572138	EMBL-EBI	liver	-	pig	SAMEA2677887	input	rep1	50	20	SE	95.93%	23428134
ERR572157	EMBL-EBI	liver	-	pig	SAMEA2677843	input	rep2	50	20	SE	96.16%	24854812
ERR572294	EMBL-EBI	liver	-	pig	SAMEA2677898	input	rep3	50	20	SE	95.92%	22289166
ERR572140	EMBL-EBI	liver	-	mouse	SAMEA2677849	input	rep1	50	20	SE	97.89%	15812547
ERR572141	EMBL-EBI	liver	-	mouse	SAMEA2677874	H3K27ac	rep2	50	20	SE	98.76%	18453668
ERR572173	EMBL-EBI	liver	-	mouse	SAMEA2677854	input	rep4	50	20	SE	97.56%	15709952
ERR572185	EMBL-EBI	liver	-	mouse	SAMEA2677851	H3K27ac	rep3	50	20	SE	99.23%	16198688
ERR572192	EMBL-EBI	liver	-	mouse	SAMEA2677849	H3K27ac	rep1	50	20	SE	98.84%	16276443
ERR572226	EMBL-EBI	liver	-	mouse	SAMEA2677851	input	rep3	50	20	SE	96.66%	17942839
ERR572227	EMBL-EBI	liver	-	mouse	SAMEA2677874	input	rep2	50	20	SE	97.89%	16536020
ERR572228	EMBL-EBI	liver	-	mouse	SAMEA2677854	H3K27ac	rep4	50	20	SE	98.96%	17656980
ERR572148	EMBL-EBI	liver	-	human	SAMEA2677850	H3K27ac	rep1	50	20	SE	98.86%	36026282
ERR572151	EMBL-EBI	liver	-	human	SAMEA2677889	H3K27ac	rep2	50	20	SE	98.52%	30726024
ERR572195	EMBL-EBI	liver	-	human	SAMEA2677889	input	rep3	50	20	SE	99.02%	23838546
ERR572219	EMBL-EBI	liver	-	human	SAMEA2677850	input	rep1	50	20	SE	98.83%	18143067
ERR572241	EMBL-EBI	liver	-	human	SAMEA2677889	H3K27ac	rep3	50	20	SE	98.75%	45779890
ERR572249	EMBL-EBI	liver	-	human	SAMEA2677866	H3K27ac	rep4	50	20	SE	98.95%	23083398
ERR572285	EMBL-EBI	liver	-	human	SAMEA2677866	input	rep4	50	20	SE	98.65%	31130181
ERR572295	EMBL-EBI	liver	-	human	SAMEA2677889	input	rep2	50	20	SE	98.83%	24265701
ERR4018311	EMBL-EBI	colon	-	pig	SAMEA4454586	H3K27ac	rep1	101	35	SE	95.08%	35941977
ERR4018314	EMBL-EBI	colon	-	pig	SAMEA4454586	input	rep1	101	35	SE	96.39%	27122353
ERR4018336	EMBL-EBI	colon	-	pig	SAMEA6712329	H3K27ac	rep2	101	35	SE	95.05%	27794804
ERR4018339	EMBL-EBI	colon	-	pig	SAMEA6712329	input	rep2	101	35	SE	94.40%	19010232
ERR4018331	EMBL-EBI	stomach	-	pig	SAMEA4454607	H3K27ac	rep1	101	35	SE	92.07%	33830655
ERR4018334	EMBL-EBI	stomach	-	pig	SAMEA4454607	input	rep1	101	35	SE	96.62%	21911289
ERR4018356	EMBL-EBI	stomach	-	pig	SAMEA4454595	H3K27ac	rep2	101	35	SE	94.48%	28866629
ERR4018359	EMBL-EBI	stomach	-	pig	SAMEA4454595	input	rep2	101	35	SE	94.33%	19907453
ERR4018321	EMBL-EBI	Ileum	-	pig	SAMEA4454602	H3K27ac	rep1	101	35	SE	94.20%	23311607
ERR4018324	EMBL-EBI	Ileum	-	pig	SAMEA4454602	input	rep1	101	35	SE	93.09%	5059614
ERR4018346	EMBL-EBI	Ileum	-	pig	SAMEA4454596	H3K27ac	rep2	101	35	SE	89.27%	33051470
ERR4018349	EMBL-EBI	Ileum	-	pig	SAMEA4454596	input	rep2	101	35	SE	92.95%	24868953
SRR414965	EMBL-EBI	ips	-	pig	SAMN00792904	H3K27ac	rep1	75	10	SE	98.36%	20706122
SRR414976	EMBL-EBI	ips	-	pig	SAMN00792915	input	rep1	75	10	SE	97.32%	4406786
SRR3137767	EMBL-EBI	ips	-	mouse	SAMN04451184	H3K27ac	rep1	50	20	SE	92.81%	38176611
SRR3137770	EMBL-EBI	ips	-	mouse	SAMN04451187	input	rep1	50	20	SE	86.15%	43280216
SRR3621885	EMBL-EBI	colon	-	mouse	SAMN05199404	H3K27ac	rep1	50	20	SE	91.37%	7215818
SRR3621889	EMBL-EBI	colon	-	mouse	SAMN05199379	input	rep1	50	20	SE	93.75%	5599664
SRR11185298	EMBL-EBI	ips/ESCs	-	human	SAMN14212253	H3K27ac	rep1	150	50	PE	97.63%	62913096
SRR11185299	EMBL-EBI	ips/ESCs	-	human	SAMN14212252	H3K27ac	rep2	150	50	PE	97.95%	71871235
SRR11185300	EMBL-EBI	ips/ESCs	-	human	SAMN14212251	H3K27ac	rep3	150	50	PE	97.73%	67986980
SRR11185368	EMBL-EBI	ips/ESCs	-	human	SAMN14212157	input	rep	150	50	PE	96.92%	150777258
SRR642579/80	EMBL-EBI	intestine	-	human	SAMN01881600	H3K27ac	rep1	36	10	SE	96.56%:	11780856
SRR642579/80	EMBL-EBI	intestine	-	human	SAMN01881600	H3K27ac	rep1	36	10	SE	96.95%	17174360
SRR642525/26	EMBL-EBI	intestine	-	human	SAMN01881600	input	rep1	36	10	SE	89.48%	16234743
SRR642525/26	EMBL-EBI	intestine	-	human	SAMN01881600	input	rep1	36	10	SE	99.57%	4340117
